# Supplementary material for: Antitrypanosomal and Antileishmanial Activity of Chalcones and Flavanones from Polygonum salicifolium
Source: PubMed Central journal article supplement (PMC7915666; doi:10.3390/pathogens10020175), 2021-02-05
Supplement: pathogens-10-00175-s001.pdf [file pathogens-10-00175-s001.pdf]

## SUPPLEMENTARY MATERIAL

# Title: Antitrypanosomal and Antileishmanial Activity of Chalcones and Flavanones from *Polygonum salicifolium*

Ahmed M. Zheoat <sup>1,7</sup>, Samya Alenezi <sup>1</sup>, Ehab Kotb Elmahallawy <sup>2,3</sup>, Marzuq A. Ungogo <sup>2,4</sup>, Ali H. Alghamdi <sup>2,5</sup>, David G. Watson <sup>1</sup>, John O. Igoli <sup>1,6</sup>, Alexander I. Gray <sup>1</sup>, Harry P. de Koning <sup>2\*</sup> and Valerie A. Ferro <sup>1</sup>

<sup>1</sup> Strathclyde Institute of Pharmacy and Biomedical Sciences, University of Strathclyde, Glasgow, United Kingdom. 1; ahmed.zheoat@strath.ac.uk (A.M.Z); s-alenezi@strath.ac.uk (S.A); igolij@gmail.com (J.O.I); .G.Watson@strath.ac.uk (D.G.W); a.i.gray345@gmail.com; (A.I.G) and v.a.ferro@strath.ac.uk (V.A.F)

<sup>2</sup> Institute of Infection, Immunity and Inflammation, College of Medical, Veterinary and Life Sciences University of Glasgow, Glasgow, United Kingdom. 2; eehaa@unileon.es (E.K.E); 2226184U@student.gla.ac.uk (M.A.U) ; a.alghamdi.2@research.gla.ac.uk (A.H.A) and Harry.De-Koning@glasgow.ac.uk (H.P.d-k)

<sup>3</sup> Department of Zoonoses, Faculty of Veterinary Medicine, Sohag University, Sohag, Egypt. 3; eehaa@unileon.es (E.K.E)

<sup>4</sup> Department of Veterinary Pharmacology and Toxicology, Ahmadu Bello University, Zaria, Nigeria. 4; 2226184U@student.gla.ac.uk

<sup>5</sup> Biology Department, Faculty of Science, Albaha University, Albaha, Saudi Arabia. 5; a.alghamdi.2@research.gla.ac.uk

<sup>6</sup> Phytochemistry Research Group, Department of Chemistry, University of Agriculture, Makurdi, Nigeria. 6; [igolij@gmail.com](mailto:igolij@gmail.com)

<sup>7</sup> Al-Manara College for Medical Sciences, Misan, Iraq.

\*, Correspondence:

Harry P. de Koning

Email:Harry.De-Koning@glasgow.ac.uk

## Compound 1

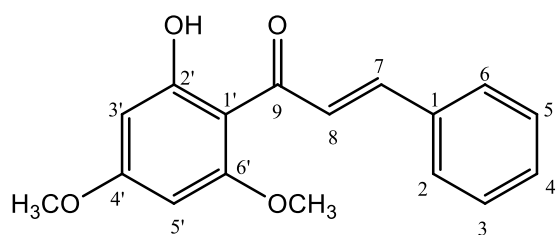

4',6'-dimethoxy-2'-hydroxychalcone

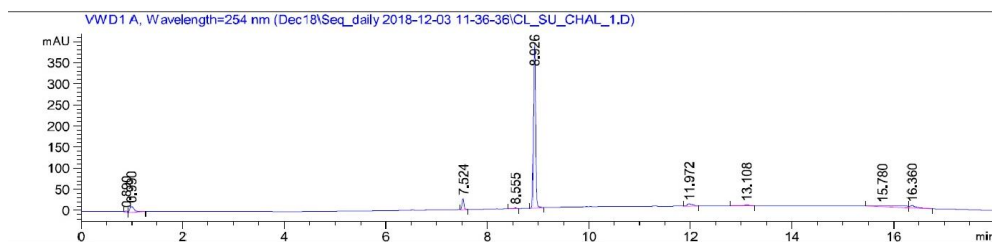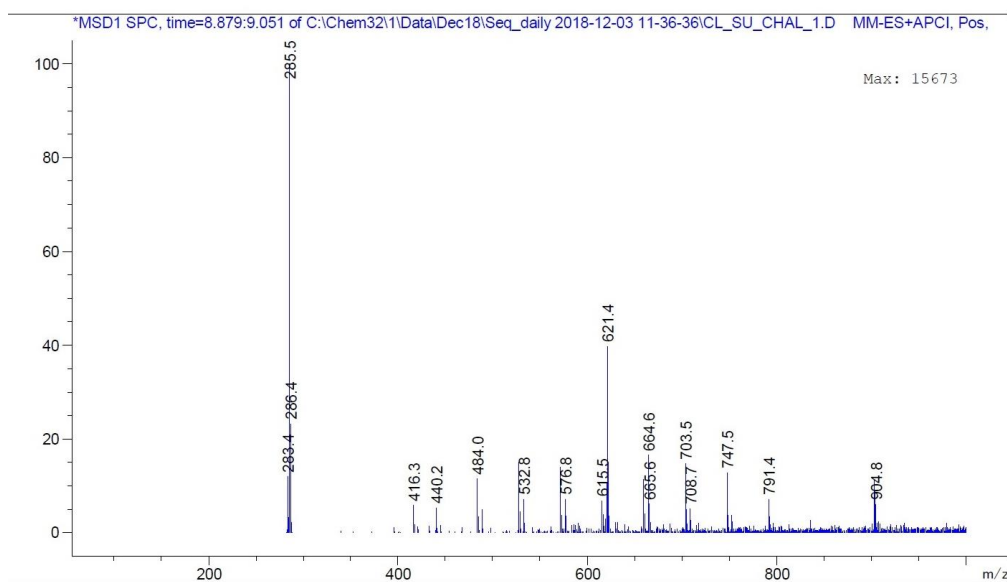

Supplementary material S1: LC-MS spectrum showing  $[M+H]^+$  ion for compound 1.

**A**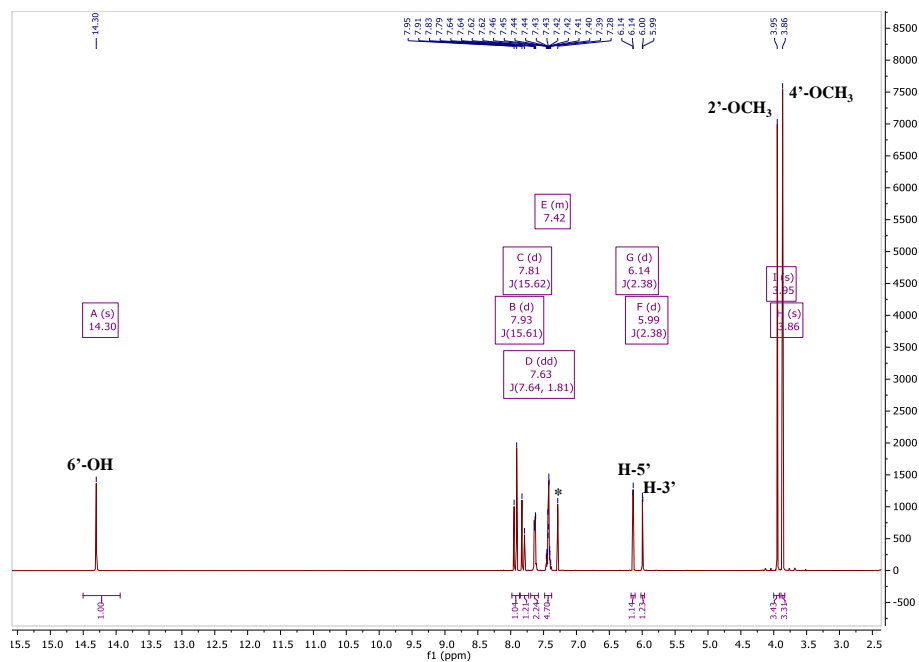**B**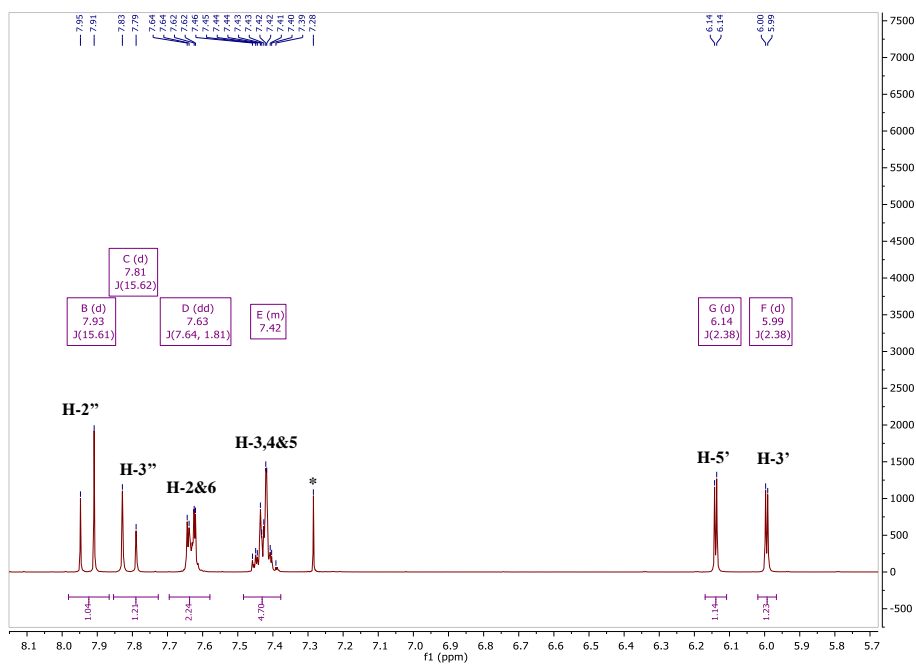

**Supplementary material S2:** (A) Full and (B) expansion of  $^1\text{H}$  NMR spectrum (500 MHz) of compound **1** in  $\text{CDCl}_3$ . \*Denotes residual solvent peak.

**A**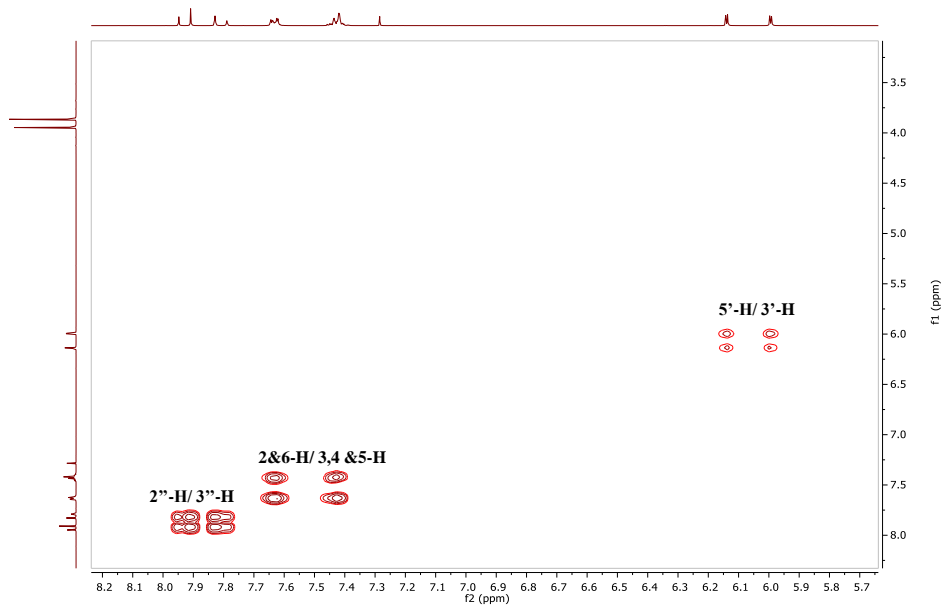**B**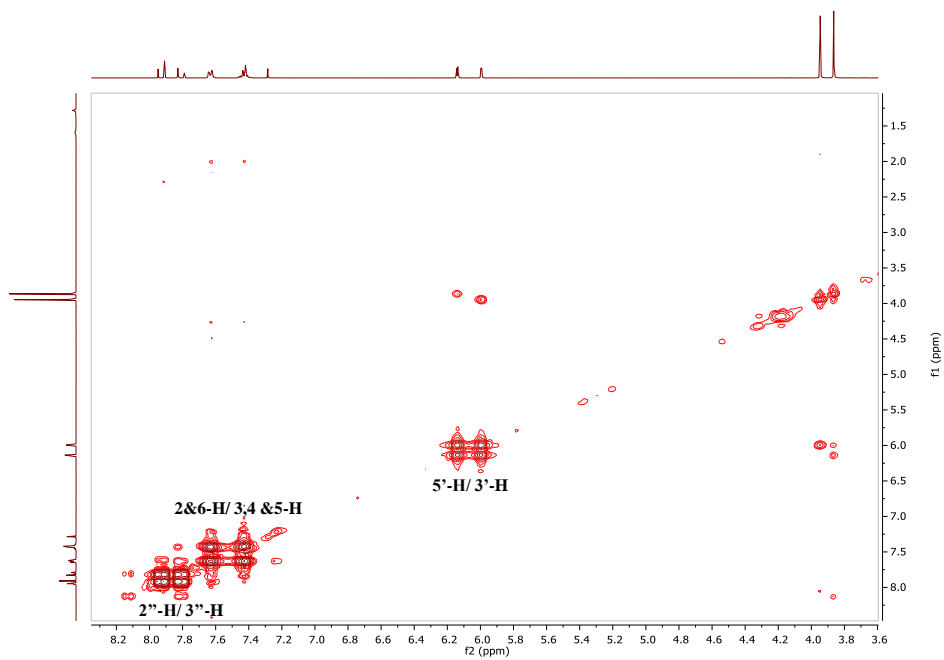

Supplementary material S3: (A) Full and (B) expansion of COSY spectrum of compound **1** in CDCl<sub>3</sub>.

**A**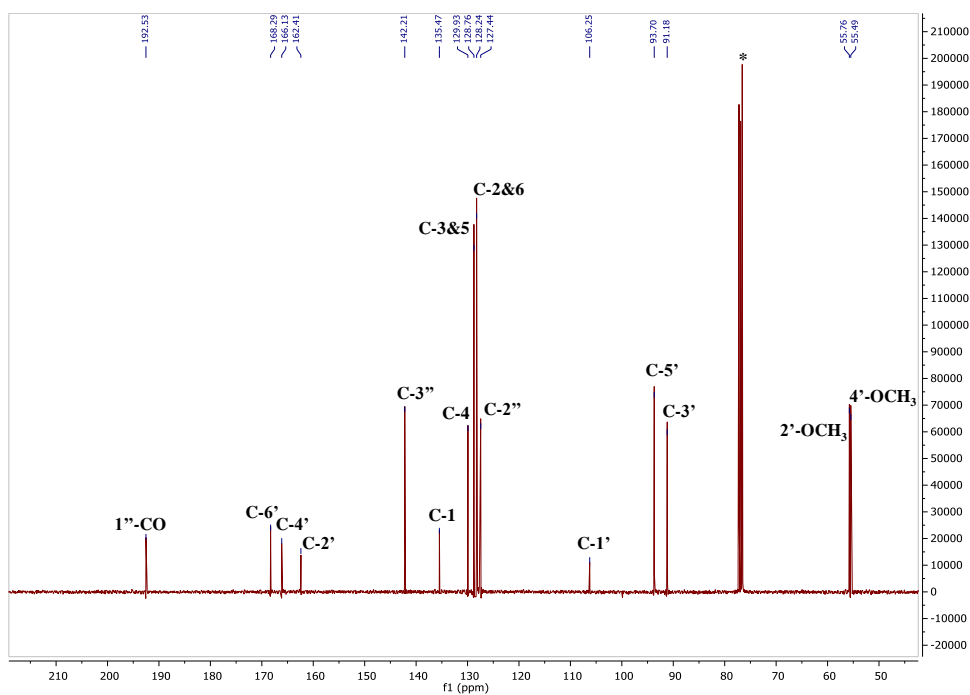**B**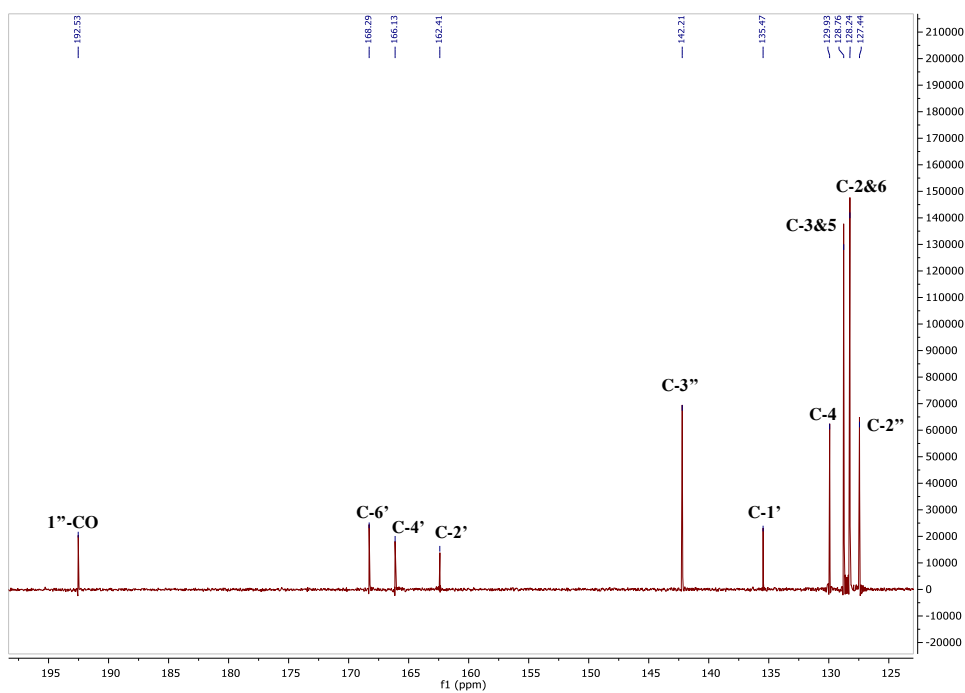

**Supplementary material S4:** (A) Full and (B) expansion of <sup>13</sup>C NMR spectrum of compound 1 in CDCl<sub>3</sub>. \*Denotes residual solvent peak.

**A**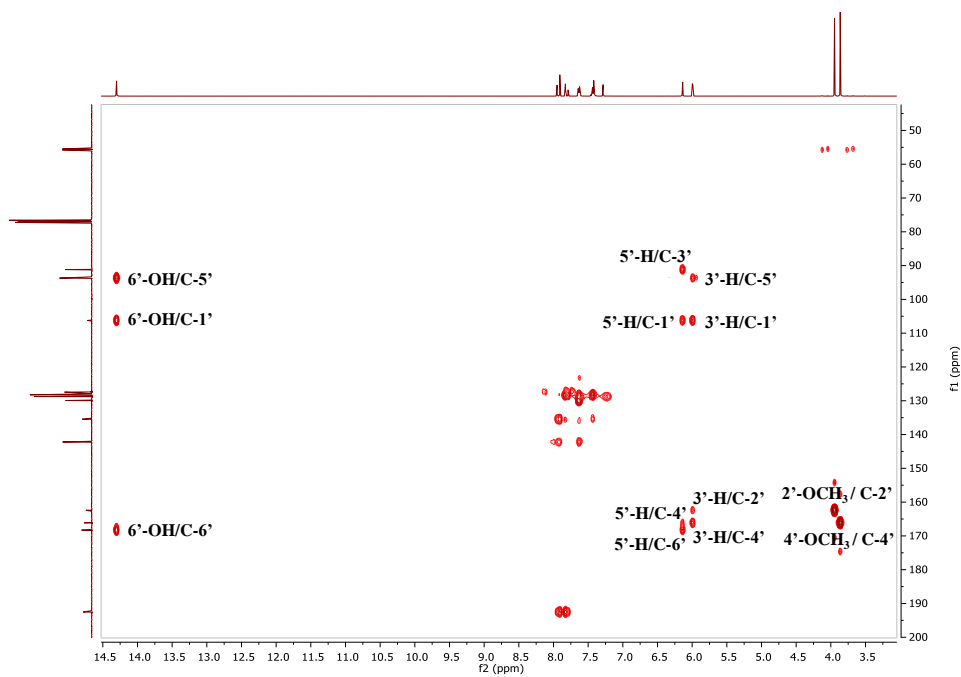**B**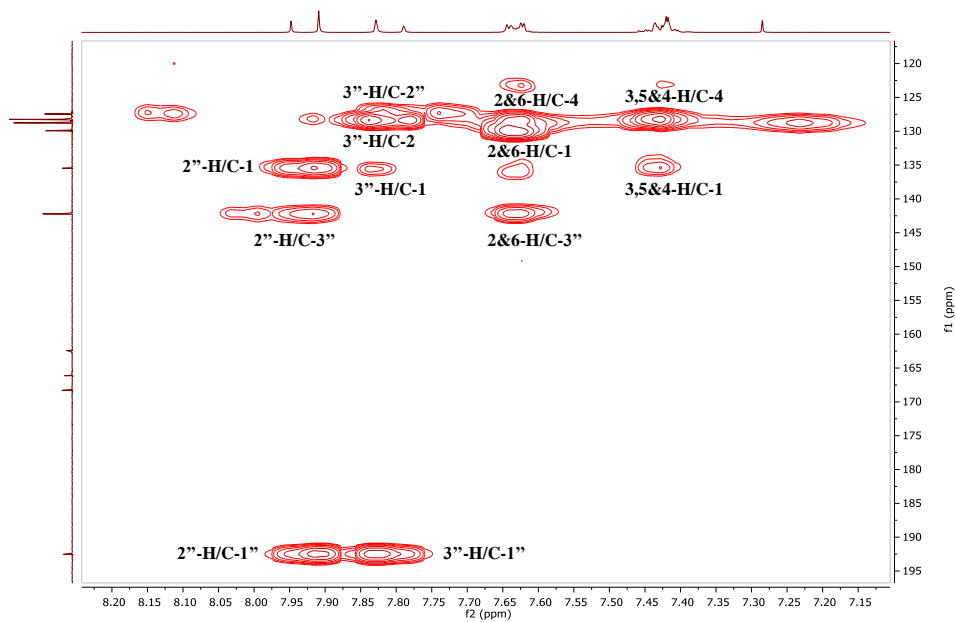

Supplementary material S5: (A) Full and (B) expansion of HMBC spectrum of compound 1 in CDCl<sub>3</sub>.

**A**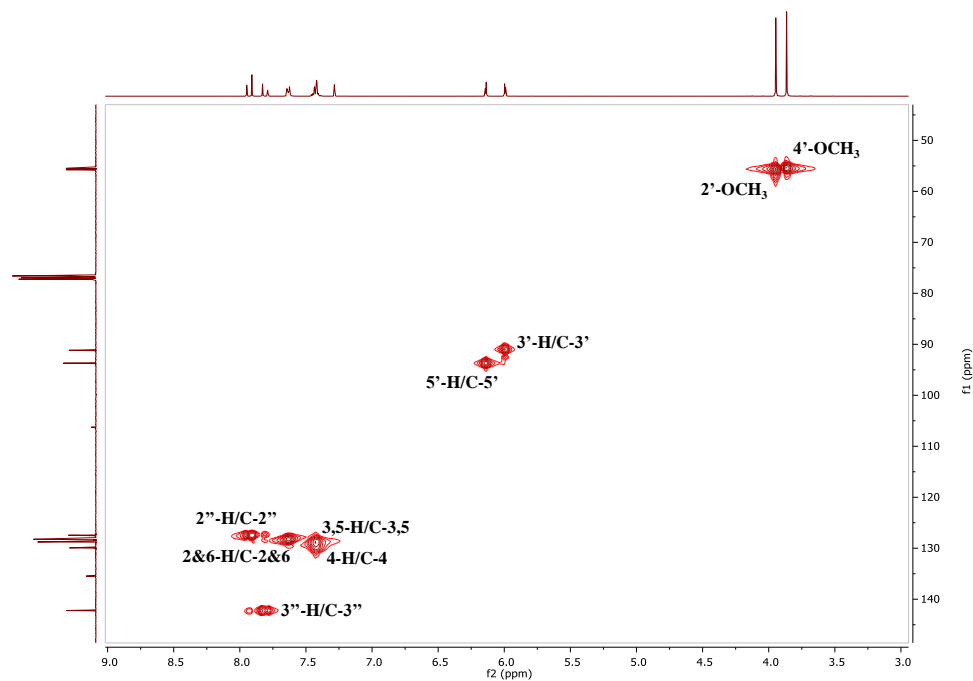**B**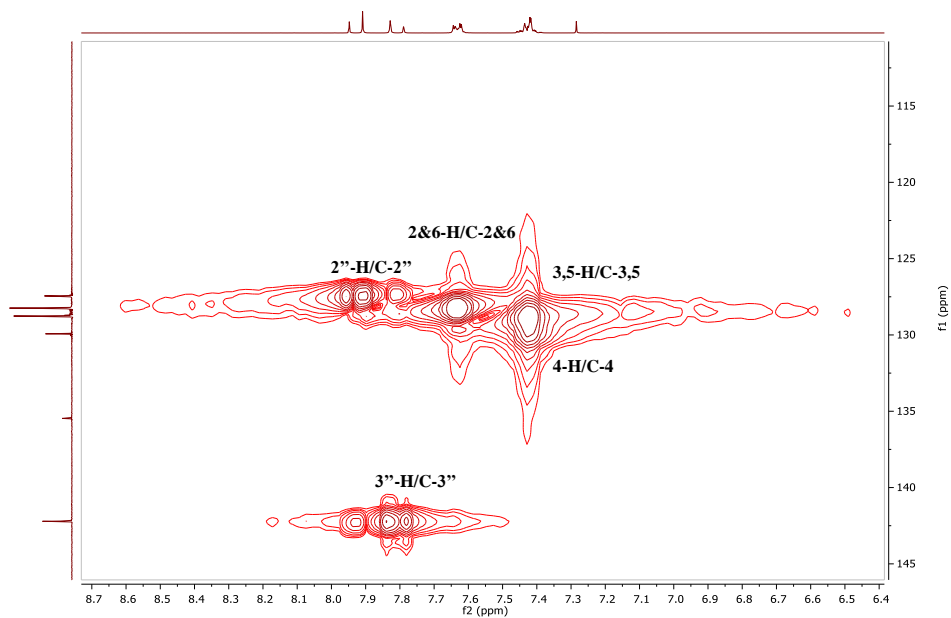

Supplementary material S6: (A) Full and (B) expansion of HSQC spectrum of compound 1 in CDCl<sub>3</sub>.

**Supplementary Table S1: NMR data for compound 1 in CDCl<sub>3</sub>**

| Position          | $\delta_{\text{H}}$ (mult, <i>J</i> (Hz)) | $\delta_{\text{C}}$ | HMBC correlations      |
|-------------------|-------------------------------------------|---------------------|------------------------|
| 1                 | -                                         | 135.4               | -                      |
| 2, 6              | 7.62 (2H, <i>dd</i> , 7.6, 1.8)           | 128.2               | C-1, C-4               |
| 3, 4, 5           | 7.42 (3H, <i>m</i> )                      | 128.7 & 129.9       | C-1, C-4               |
| 7                 | 7.83 (1H, <i>d</i> , 15.6)                | 142.2               | C-1, C-2, C-8, C-9     |
| 8                 | 7.91 (1H, <i>d</i> , 15.6)                | 127.4               | C-1, C-7, C-9          |
| 9                 | -                                         | 192.5               | -                      |
| 1'                | -                                         | 106.2               | -                      |
| 2'                | -                                         | 168.2               | -                      |
| 3'                | 6.14 (1H, <i>d</i> , 2.6)                 | 93.7                | C-1', C-2', C-4', C-5' |
| 4'                | -                                         | 166.1               | -                      |
| 5'                | 5.99 (1H, <i>d</i> , 2.6)                 | 91.1                | C-1', C-3', C-4', C-6' |
| 6'                | -                                         | 162.4               | -                      |
| 2'-OH             | 14.30 ( <i>s</i> )                        | -                   | C-1', C-2', C-3'       |
| O-CH <sub>3</sub> | 3.86 (3H, <i>s</i> )                      | 55.4                | C-4'                   |
| O-CH <sub>3</sub> | 3.95 (3H, <i>s</i> )                      | 55.7                | C-6'                   |



## Compound 2

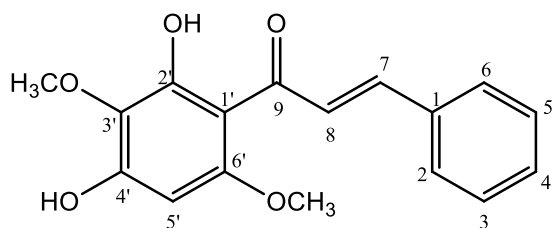

### 3',6'-dimethoxy-2',4'-dihydroxychalcone.

C:\Users\...IP5H-35

03/03/2016 19:53:09

RT: 0.00 - 9.99 SM: 11B

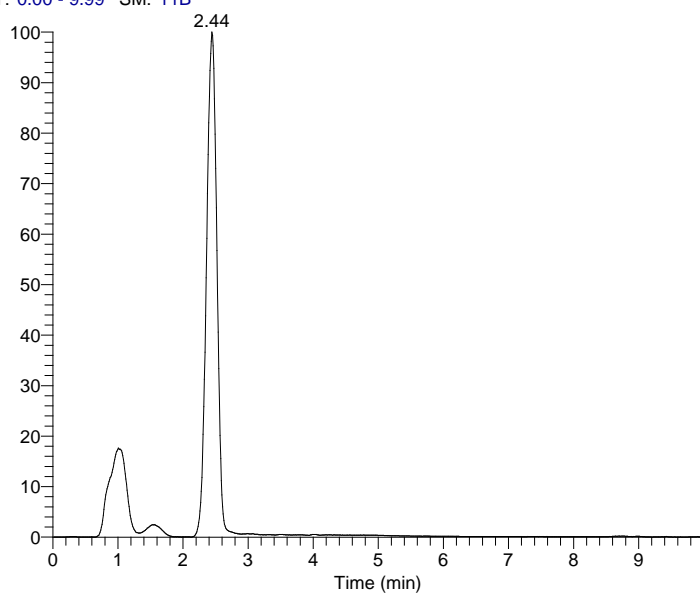

NL:  
8.56E7  
m/z=  
301.00-301.50 F:  
FTMS + c ESI Full  
ms  
[100.00-1200.00]  
MS P5H-35

P5H-35 #253 RT: 2.43 AV: 1 NL: 9.13E7  
F: FTMS + c ESI Full ms [100.00-1200.00]

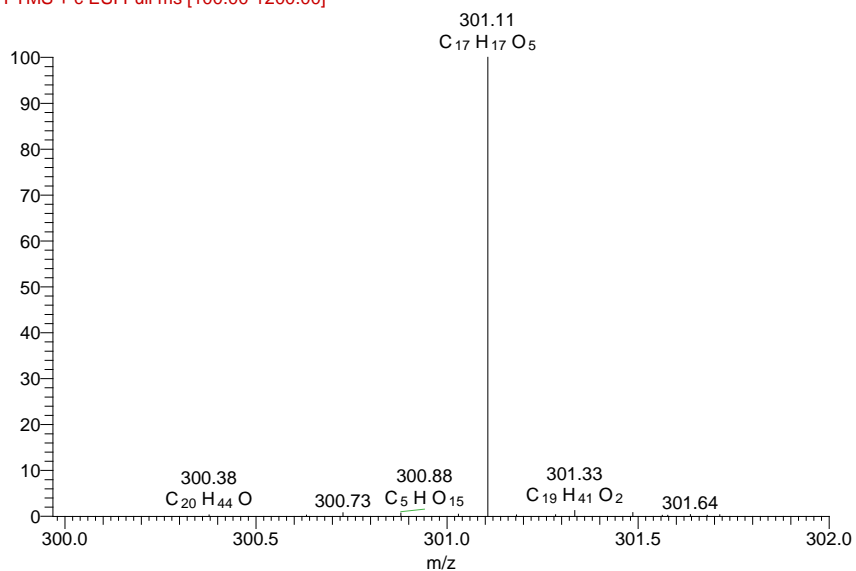

### Supplementary material S7: HR-LC-MS spectrum showing [M+H]<sup>+</sup> ion for compound 2

**A**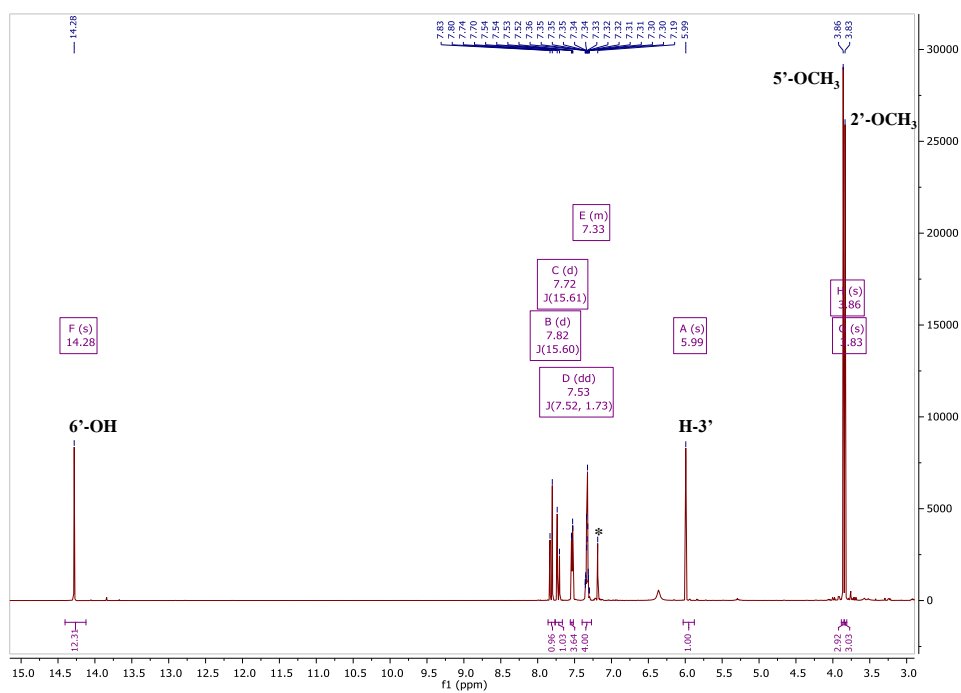**B**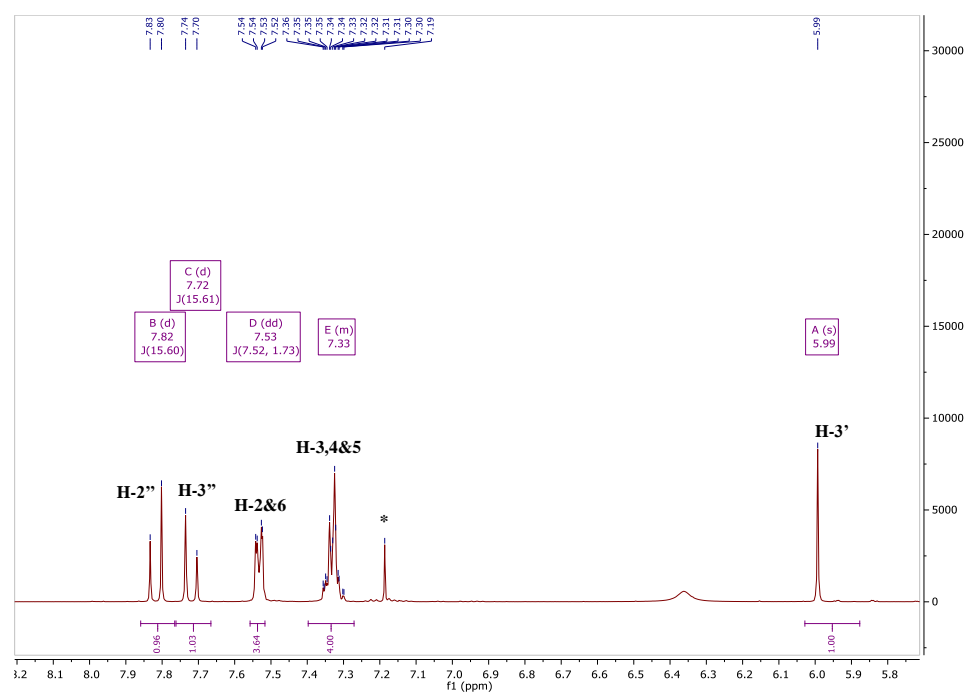

**Supplementary material 8:** (A) Full  $^1\text{H}$  NMR spectrum (500 MHz) of compound **2** in  $\text{CDCl}_3$  and (B) expansion of the aromatic region. \*Denotes residual solvent peak.

**A**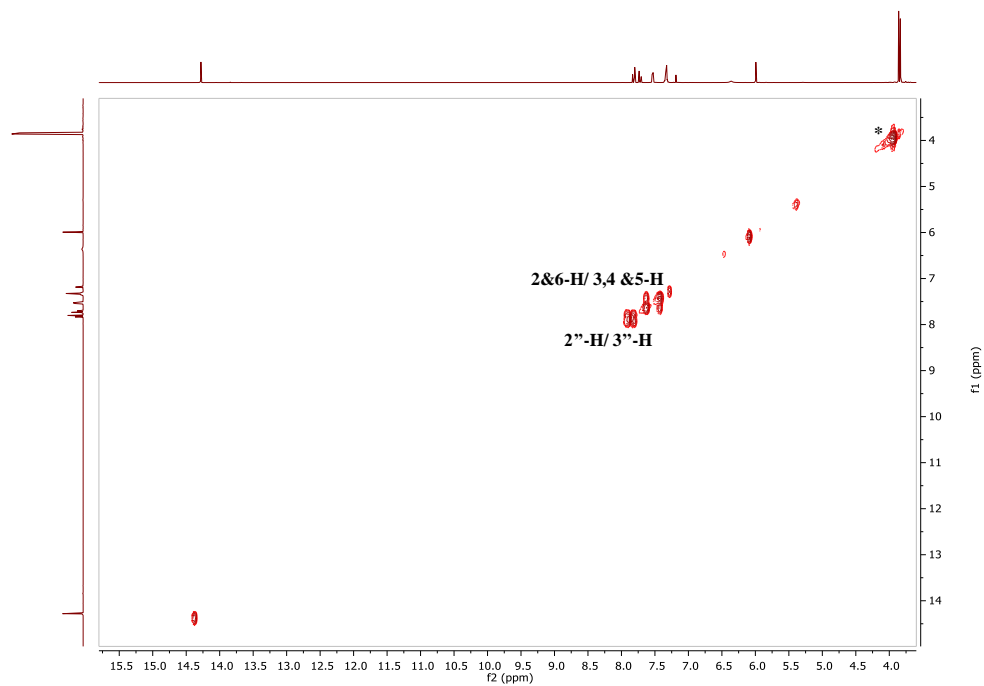**B**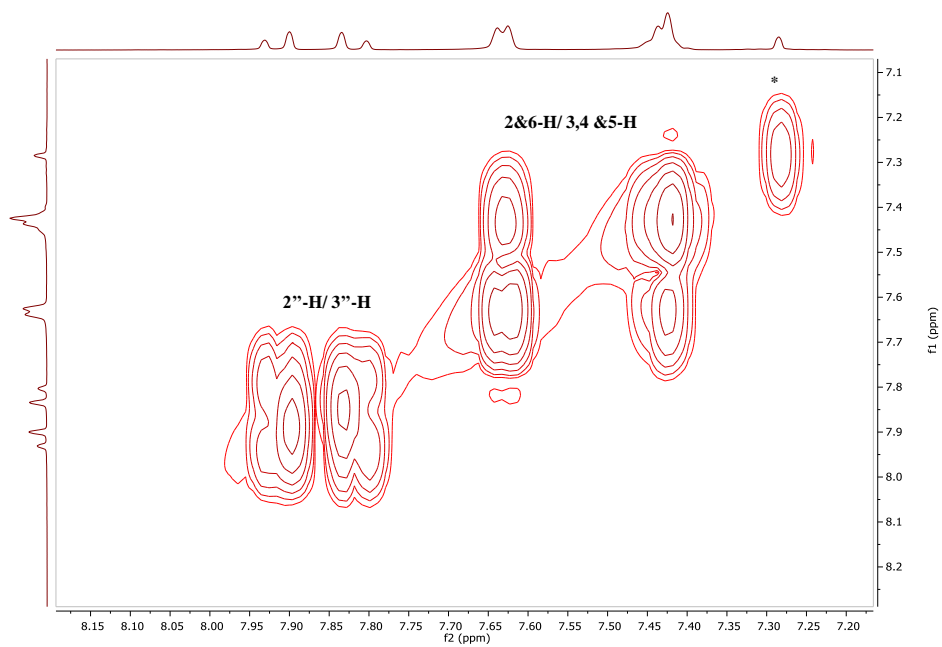

Supplementary material S9: (A) Full and (B) expansion of COSY spectrum of compound 2 in CDCl<sub>3</sub>.

**A**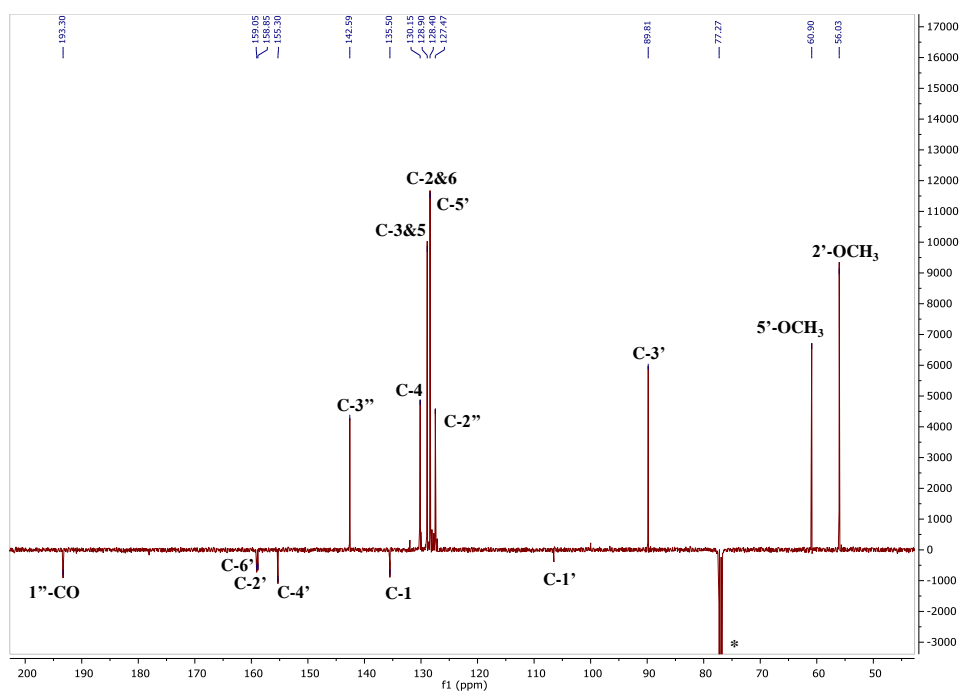**B**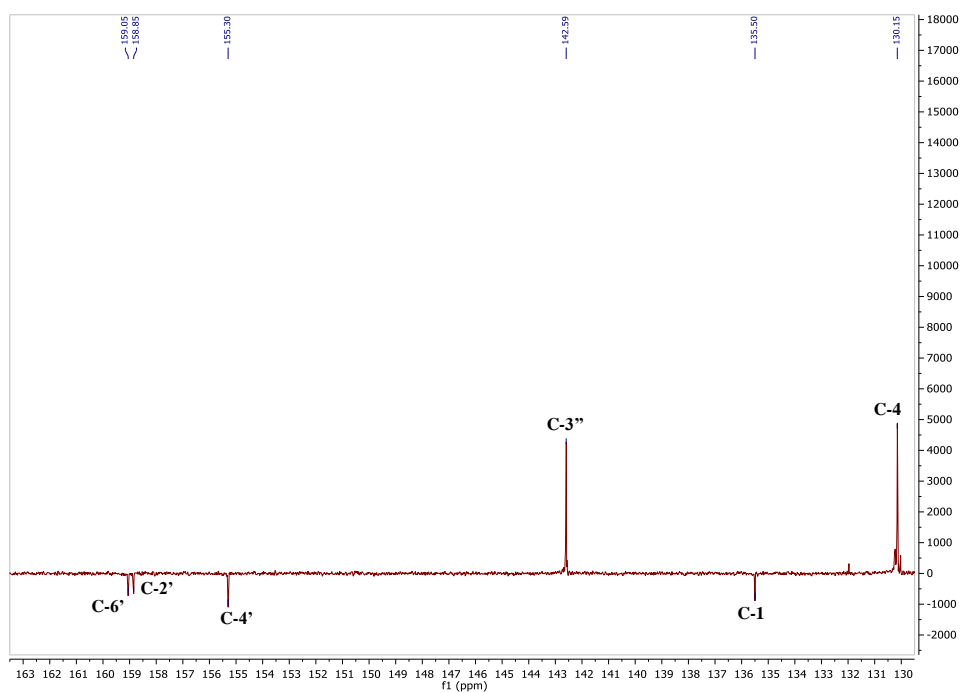

Supplementary Spectrum S10: (A) Full and (B) expansion of DEPTq  $^{13}\text{C}$  NMR spectrum of compound 2 in  $\text{CDCl}_3$ . \*Denotes residual solvent peak.

**A**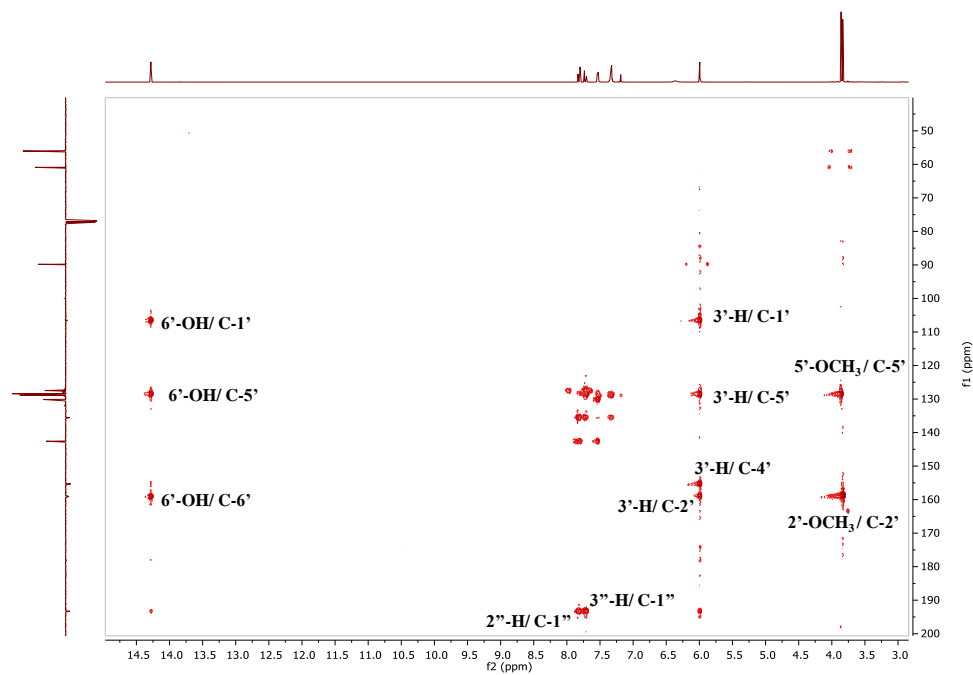**B**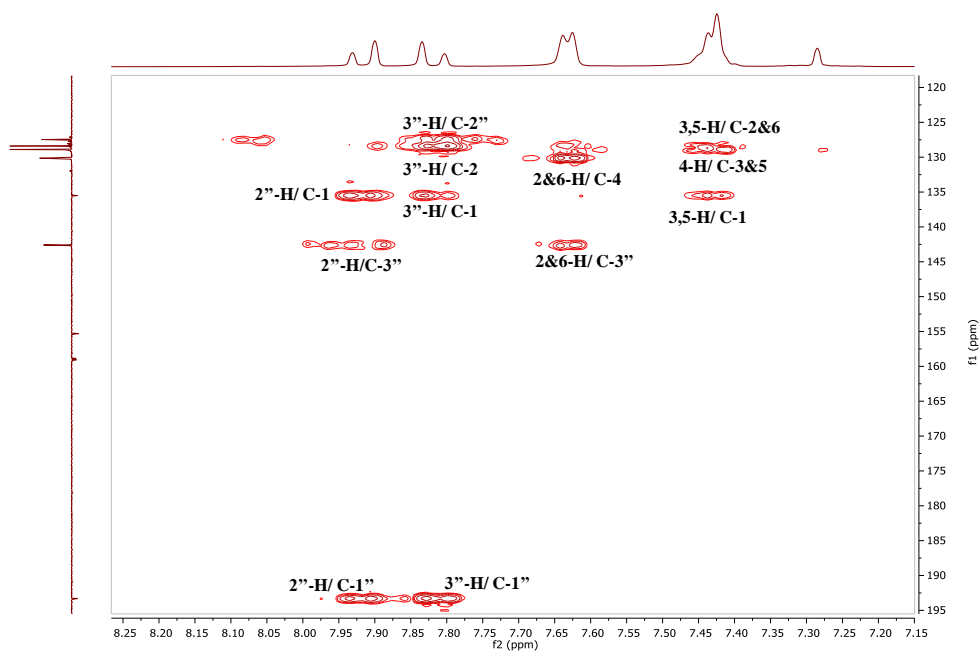

Supplementary material S11: (A) Full and (B) expansion of HMBC spectrum of compound 2 in CDCl<sub>3</sub>.

**A**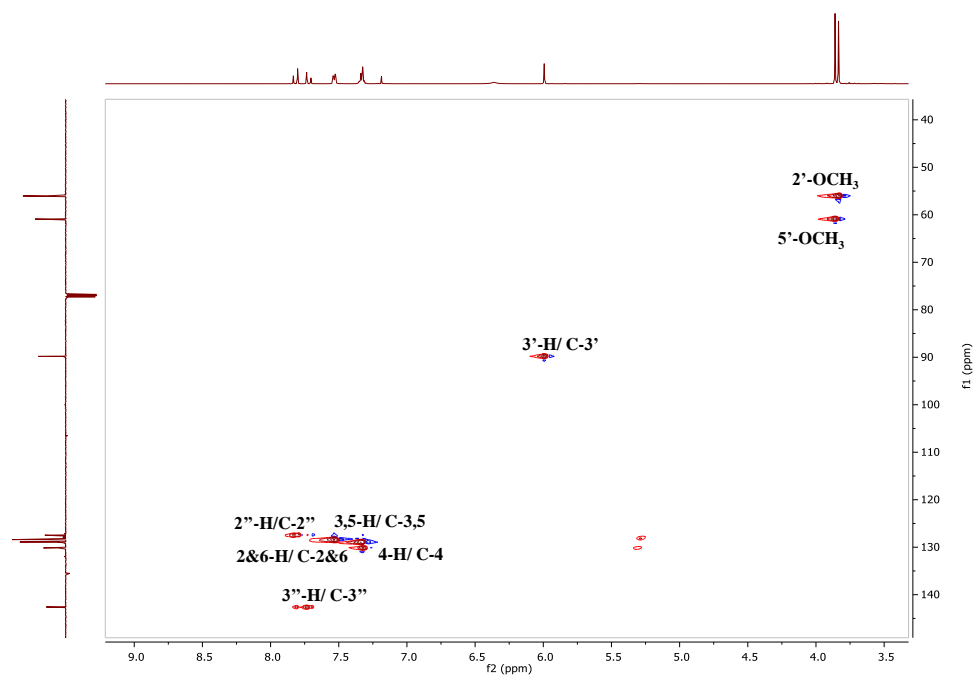**B**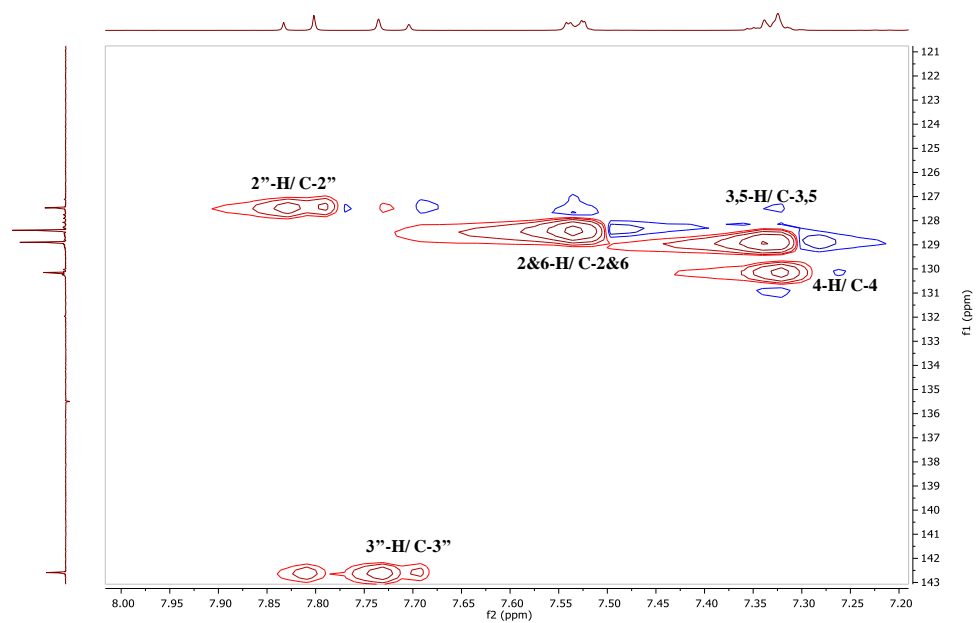

Supplementary material S12: (A) Full and (B) expansion of HSQC spectrum of compound 2 in CDCl<sub>3</sub>.

**Supplementary Table S2: NMR data for compound 2 in CDCl<sub>3</sub>**

| Position          | $\delta_{\text{H}}$ (mult, <i>J</i> (Hz)) | $\delta_{\text{C}}$ | HMBC                   |
|-------------------|-------------------------------------------|---------------------|------------------------|
| 1                 | -                                         | 135.5               | -                      |
| 2, 6              | 7.53 (2H, dd, 7.5, 1.7)                   | 128.4               | C-1, C-7               |
| 3, 4, 5           | 7.33 (3H, m)                              | 128.9, 130.1        | C-1, C4                |
| 7                 | 7.72 (1H, d, 15.6)                        | 142.5               | C-1, C-9, C-8          |
| 8                 | 7.82 (1H, d, 15.6)                        | 127.4               | C-1, C-9, C-7          |
| 9                 | -                                         | 193.3               | -                      |
| 1'                | -                                         | 106.5               | -                      |
| 2'                | -                                         | 159.0               | C-1', C-2', C-3'       |
| 3'                | -                                         | 128.4               | -                      |
| 4'                | -                                         | 155.3               | -                      |
| 5'                | 5.99 (1H, s)                              | 89.8                | C-1', C-3', C-4', C-6' |
| 6'                | -                                         | 158.8               | -                      |
| 2'-OH             | 14.2 (s)                                  | -                   | -                      |
| O-CH <sub>3</sub> | 3.83 (3H, s)                              | 60.1                | C-4'                   |
| O-CH <sub>3</sub> | 3.86 (3H, s)                              | 56.0                | C-6'                   |

### Compound 3

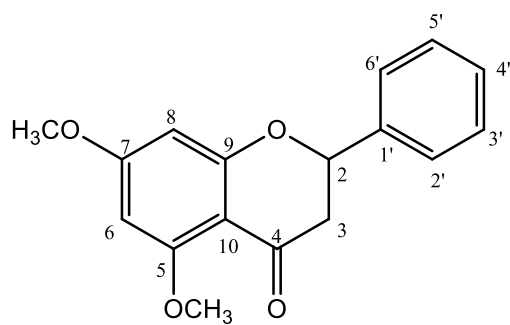

5,7-dimethoxyflavanone

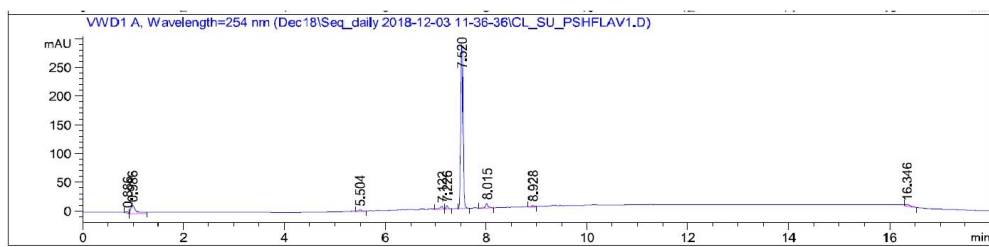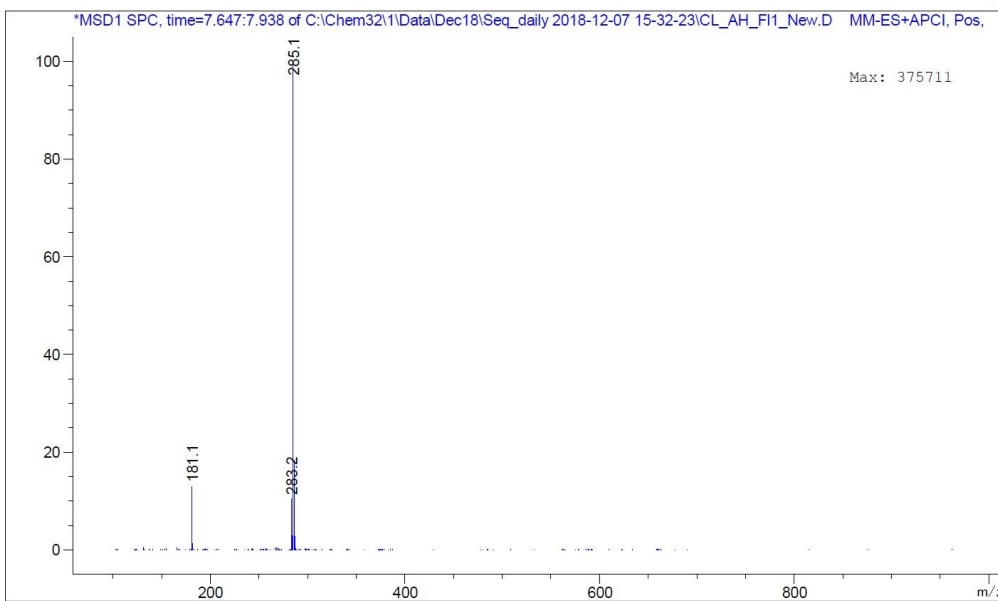

Supplementary material S13: LC-MS spectrum showing  $[M+H]^+$  ion for compound 3.



**A**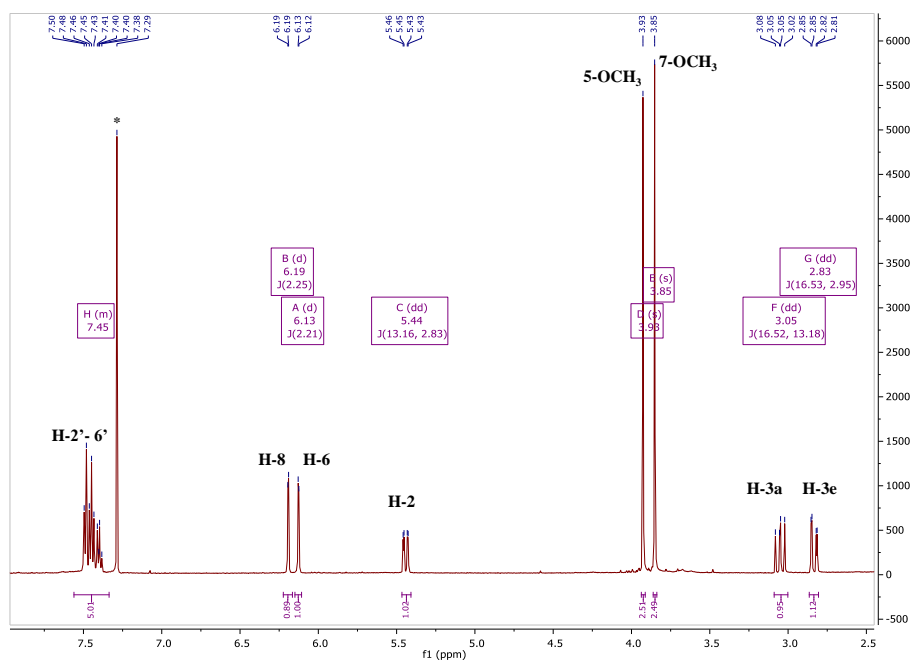**B**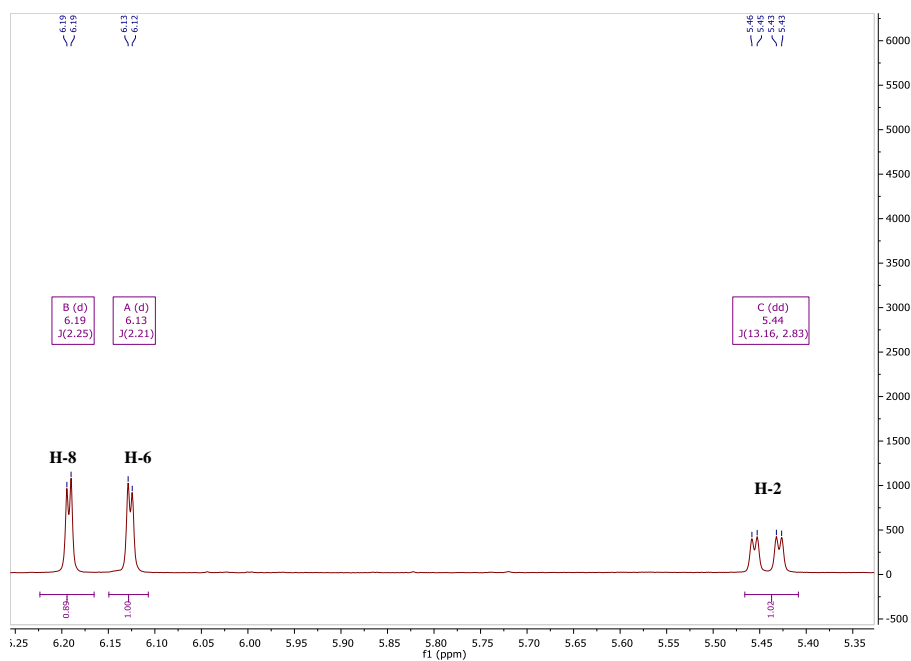

**Supplementary material S14:** (A) Full and (B) expansion of  $^1\text{H}$  NMR spectrum (500 MHz) in  $\text{CDCl}_3$  of compound 3. \*Denotes residual solvent peak

**A**

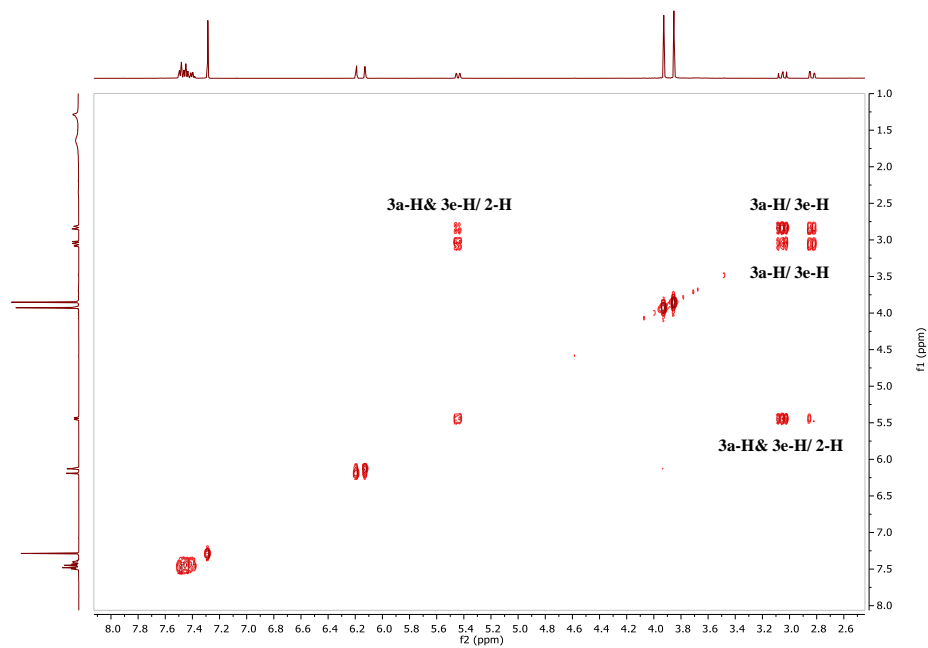

**B**

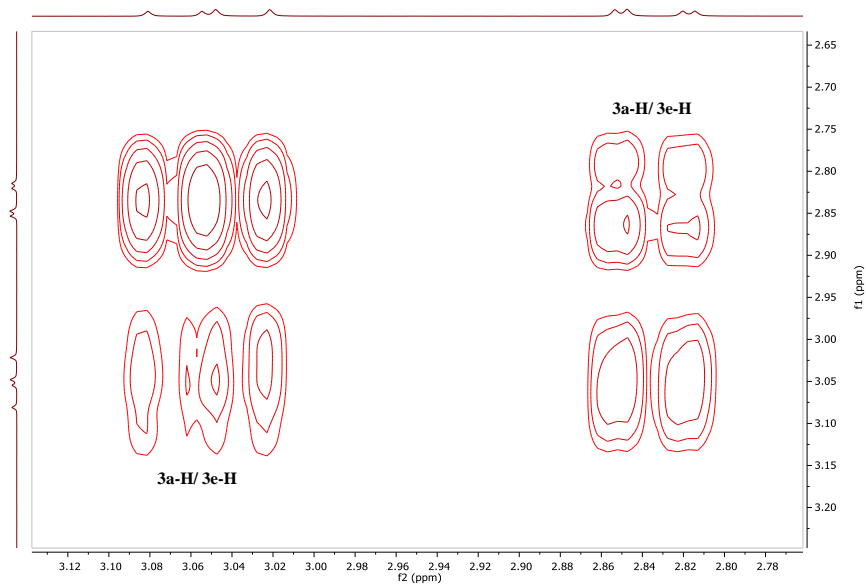

**Supplementary Spectrum S15:** (A) Full and (B) expansion of COSY spectrum of compound **3** in CDCl<sub>3</sub>.

**A**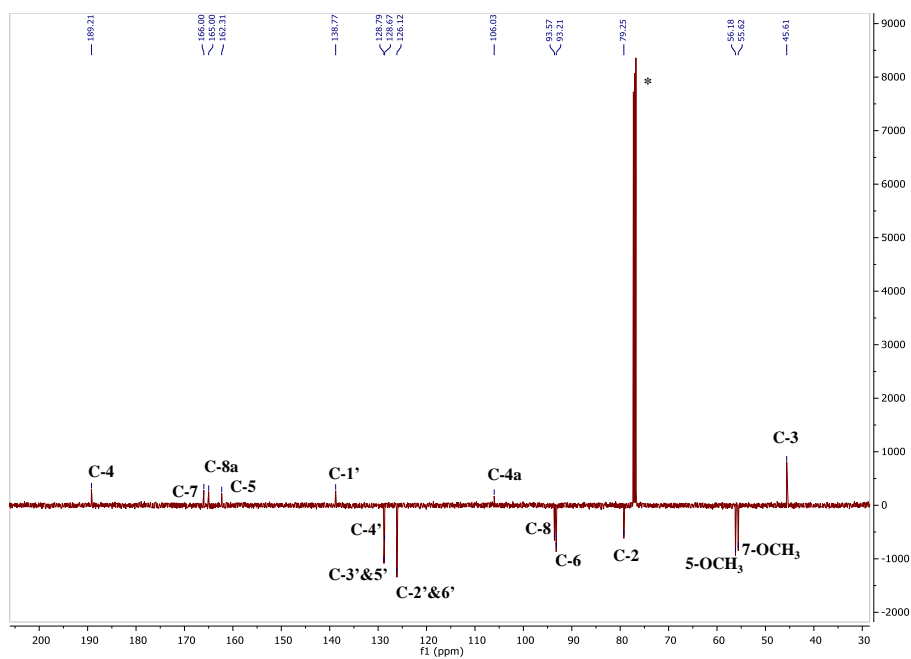**B**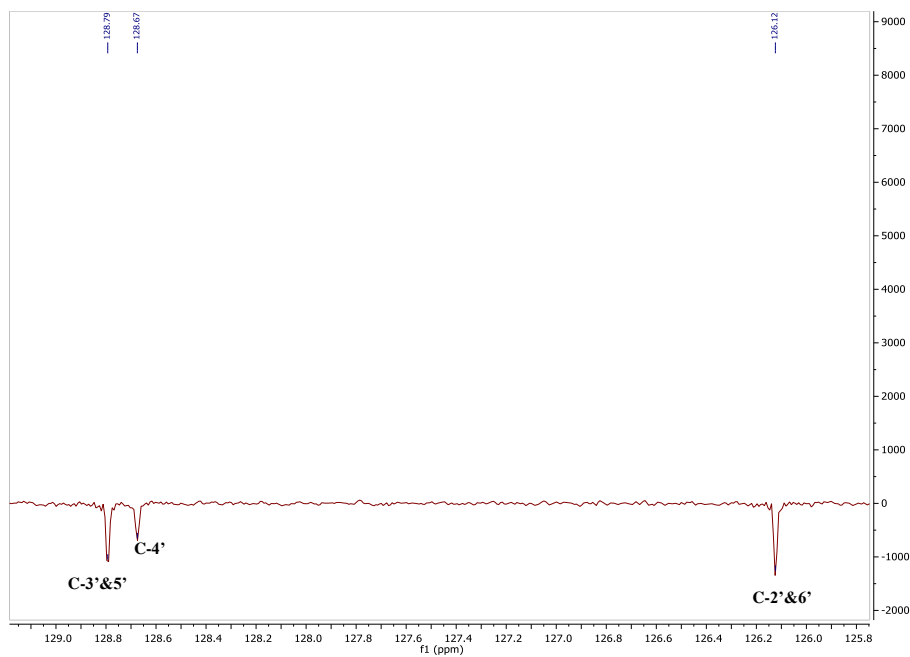

**Supplementary material S16:** (A) Full and (B) expansion of DEPTq 135 <sup>13</sup>C NMR spectrum of compound **3** in CDCl<sub>3</sub>. \*Denotes residual solvent peak

**A**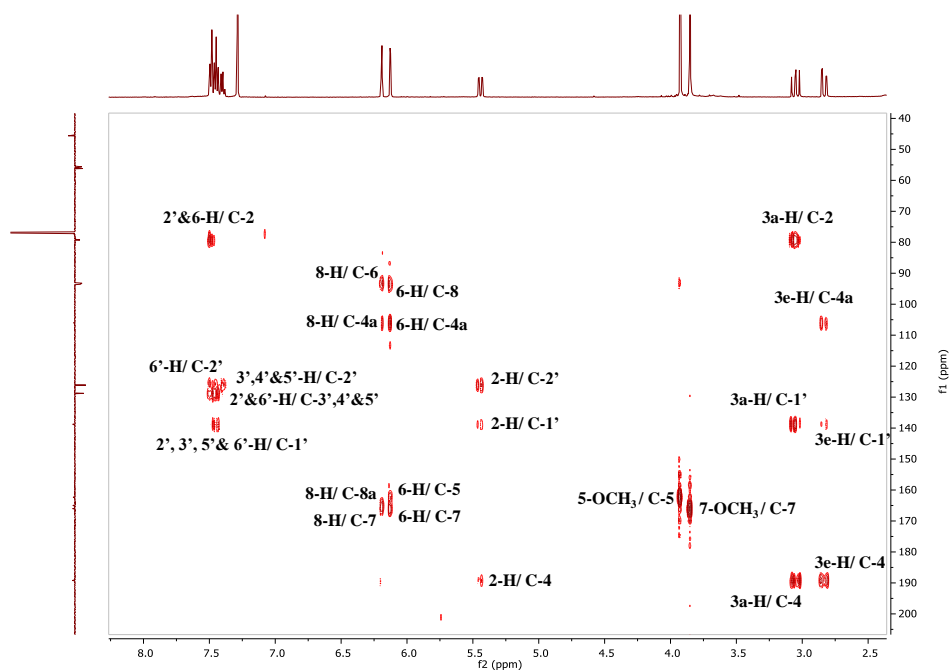**B**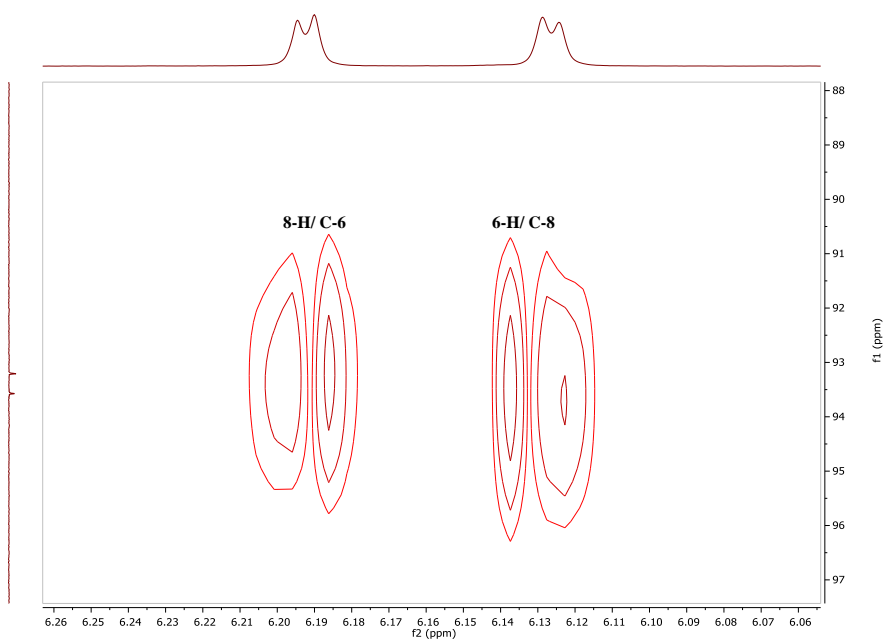

Supplementary material S17: (A) Full and (B) expansion of HMBC spectrum of compound **3** in CDCl<sub>3</sub>.

**A**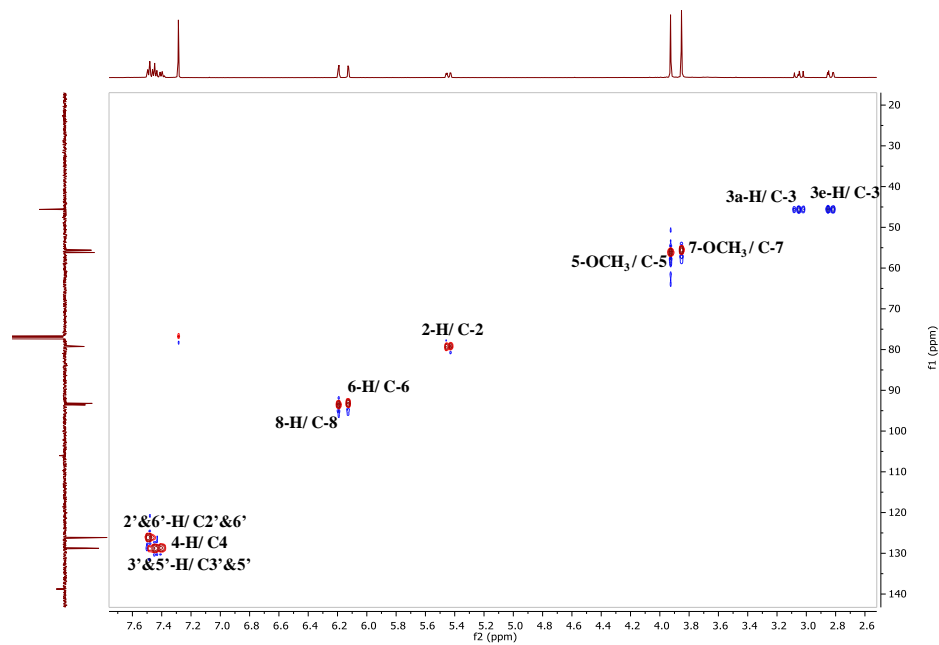**B**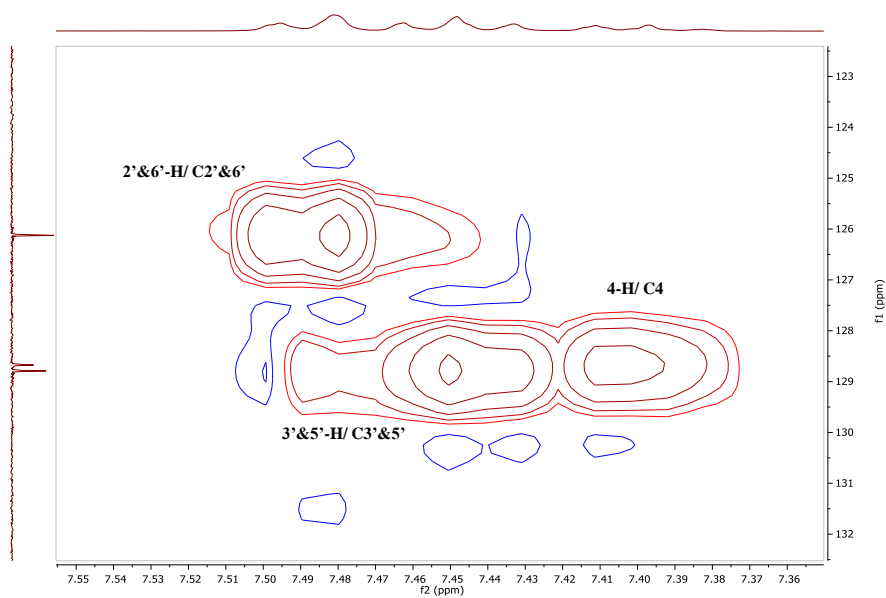

Supplementary material S18: (A) Full and (B) expansion of HSQC spectrum of compound 3 in CDCl<sub>3</sub>.

**Supplementary Table S3: NMR data for compound 3 in CDCl<sub>3</sub>.**

| Position           | $\delta_{\text{H}}$ (mult, <i>J</i> (Hz))              | $\delta_{\text{C}}$ | HMBC                        |
|--------------------|--------------------------------------------------------|---------------------|-----------------------------|
| 2                  | 5.44 (1H, dd, 13.1, 2.8)                               | 79.2                | C-2', C-1', C-4             |
| 3                  | 2.83 (1H, dd, 16.5, 2.8),<br>3.05 (1H, dd, 16.5, 13.1) | 45.6                | C-1', C-4, C-10             |
| 4                  | -                                                      | 189.2               | -                           |
| 5                  | -                                                      | 162.3               | -                           |
| 6                  | 6.13 (1H, d, 2.2)                                      | 93.2                | C-8, C-5, C-7, C-10         |
| 7                  | -                                                      | 166.0               | -                           |
| 8                  | 6.19 (1H, d, 2.2)                                      | 93.6                | C-6, C-9, C-10              |
| 9                  | -                                                      | 165.0               | -                           |
| 10                 | -                                                      | 106.0               | -                           |
| 1'                 | -                                                      | 138.7               | -                           |
| 2', 6'             | 7.5 (2H, m)                                            | 126.1               | C-1', C-2, C-3', C-4', C-5' |
| 3', 4', 5'         | 7.38 (3H, m)                                           | 128.7, 128.8        | C-2', C-1'                  |
| 5-OCH <sub>3</sub> | 3.98 (3H, s)                                           | 56.1                | C-5                         |
| 7-OCH <sub>3</sub> | 3.85 (3H, s)                                           | 55.6                | C-7                         |

## Compound 4

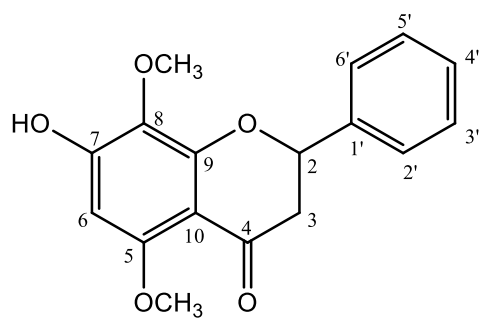

7-hydroxy-5,8-dimethoxy flavanone.

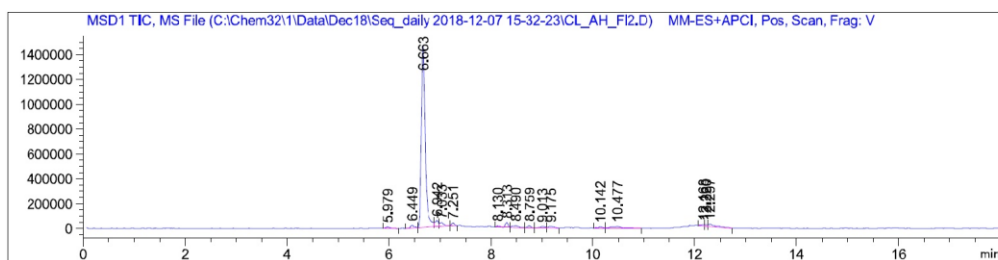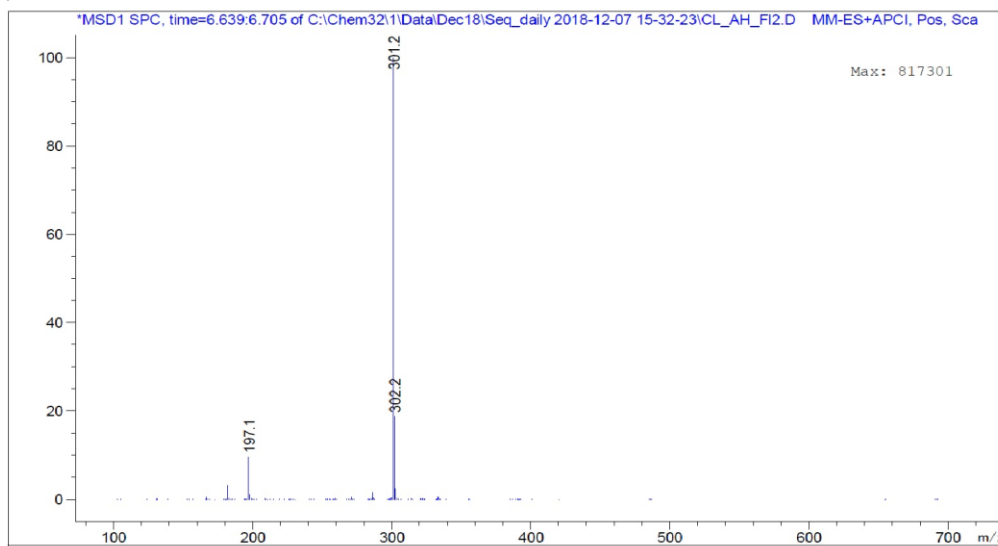

Supplementary material S19: LC-MS spectrum showing  $[M+H]^+$  ion for compound 4

**A**

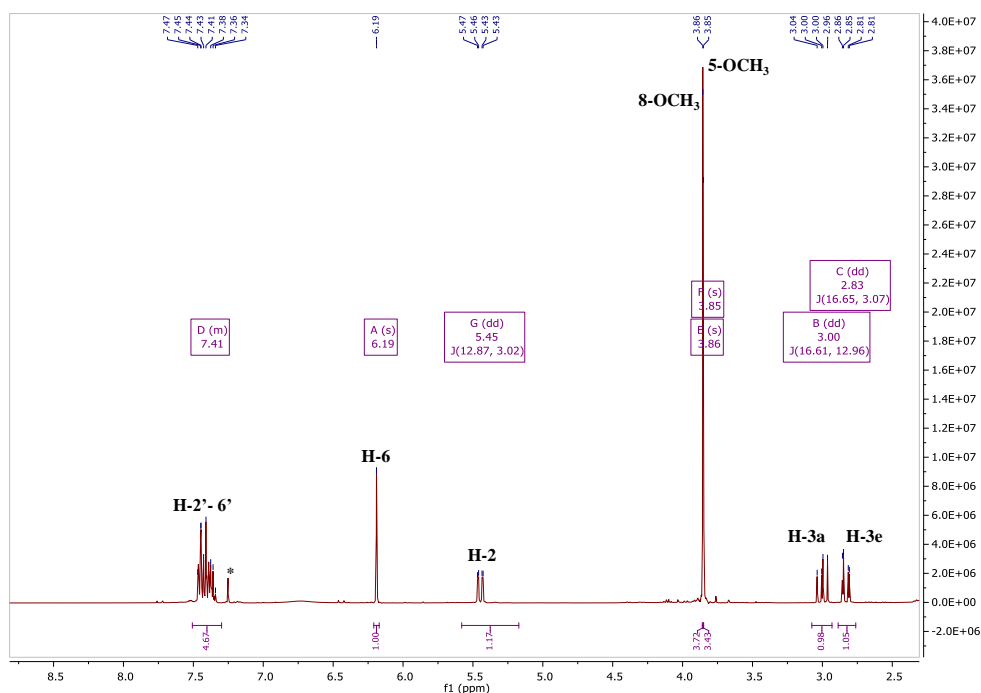

**B**

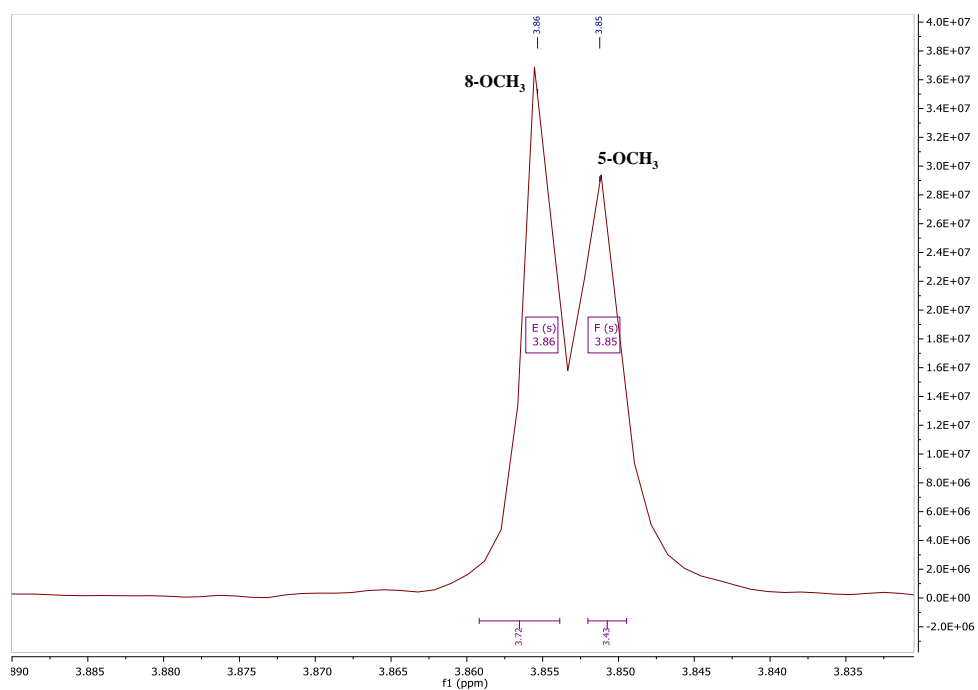

**Supplementary material S20:** (A) Full  $^1\text{H}$  NMR spectrum (500 MHz) of compound **4** in  $\text{CDCl}_3$  and (B) expansion of the methoxy region. \*Denotes residual solvent peak.



**A**

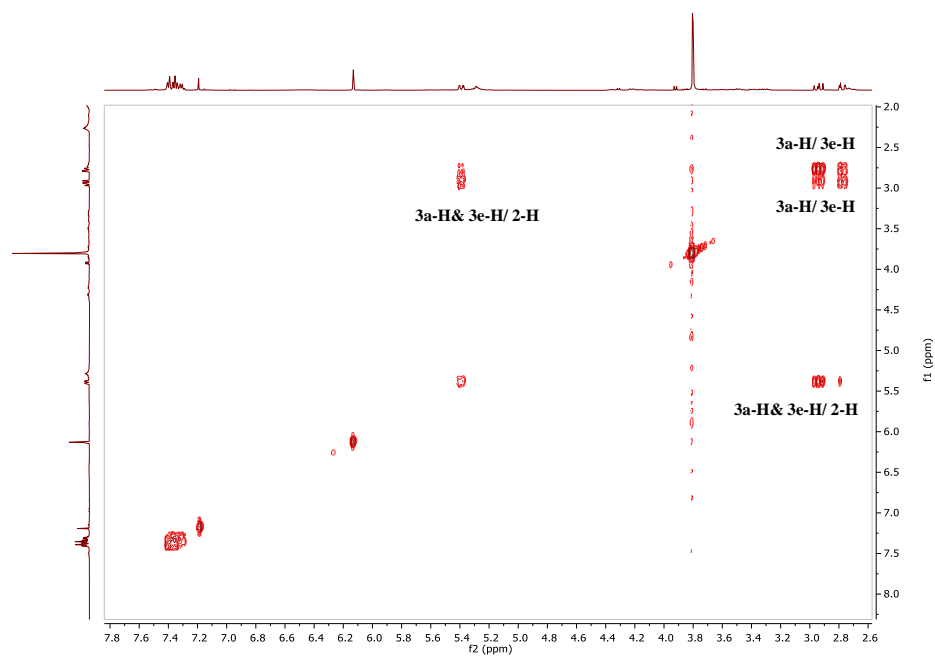

**B**

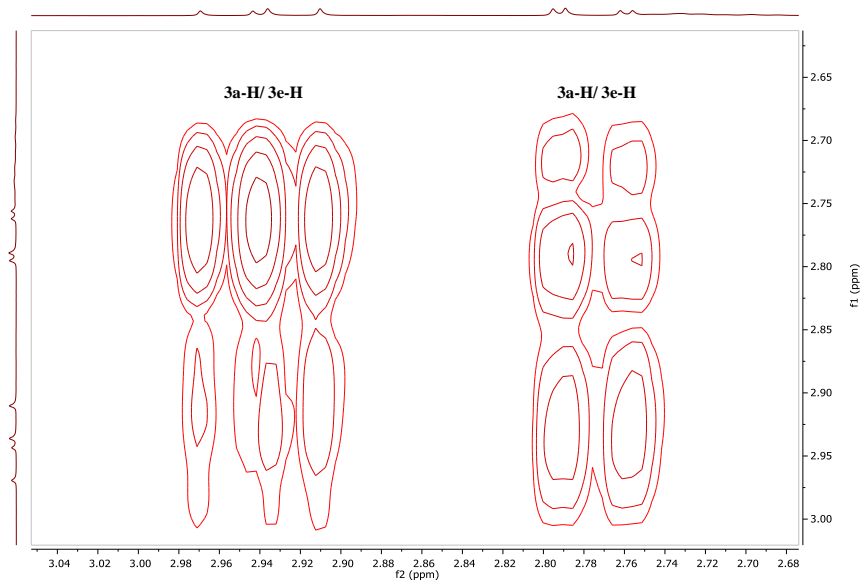

**Supplementary Spectrum S21:** (A) Full and (B) expansion of COSY spectrum of compound 4 in CDCl<sub>3</sub>.

**A**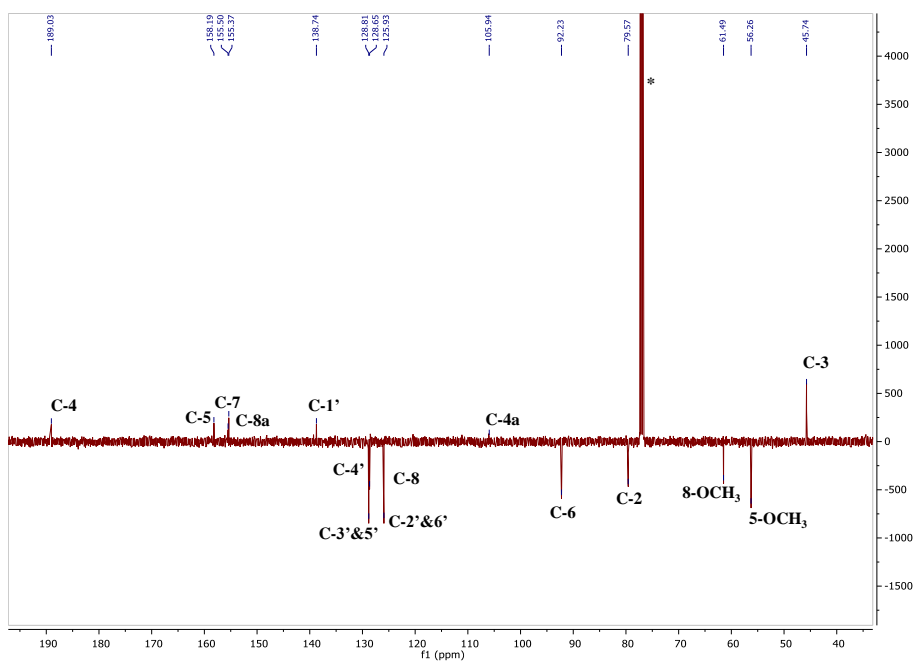**B**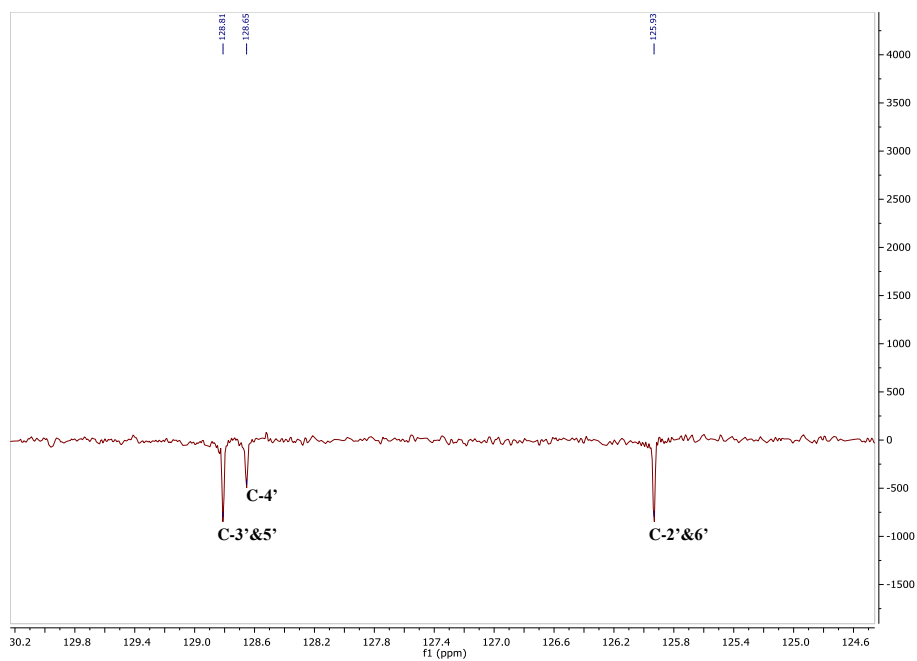

**Supplementary material S22:** (A) Full DEPTq  $^{135}$   $^{13}\text{C}$ -NMR spectrum in  $\text{CDCl}_3$  of compound **4** and (B) expansion of B ring signals.

**A**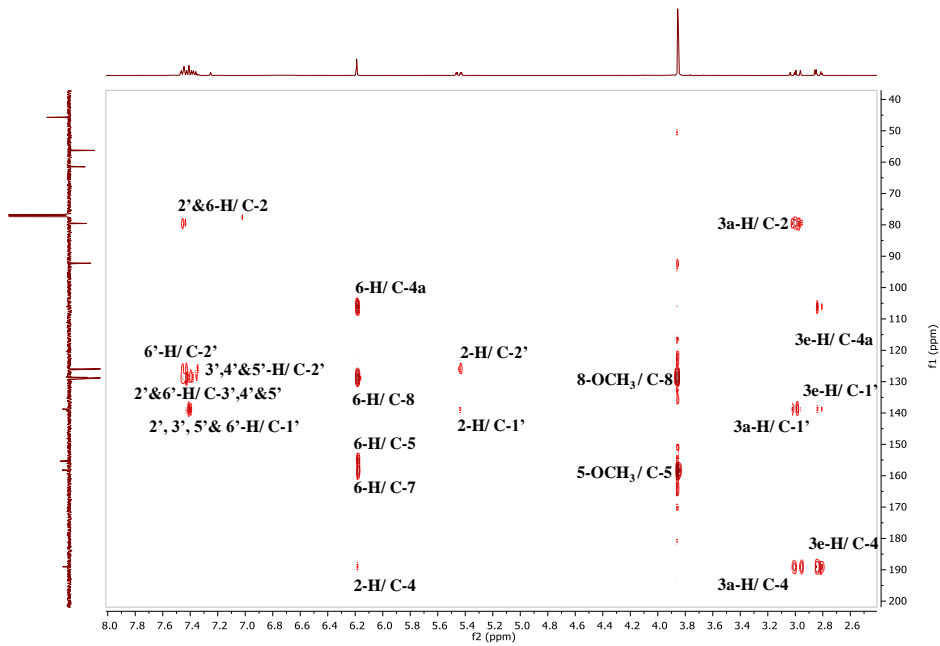**B**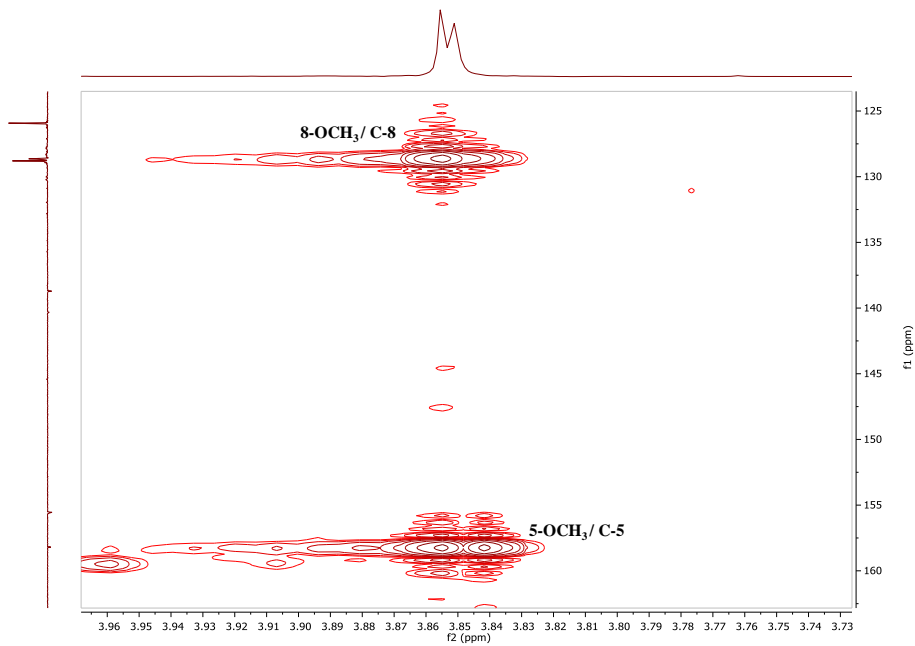

Supplementary material 23: (A) Full HMBC spectrum in CDCl<sub>3</sub> and (B) expansion of the methoxy region of compound 4.

**A**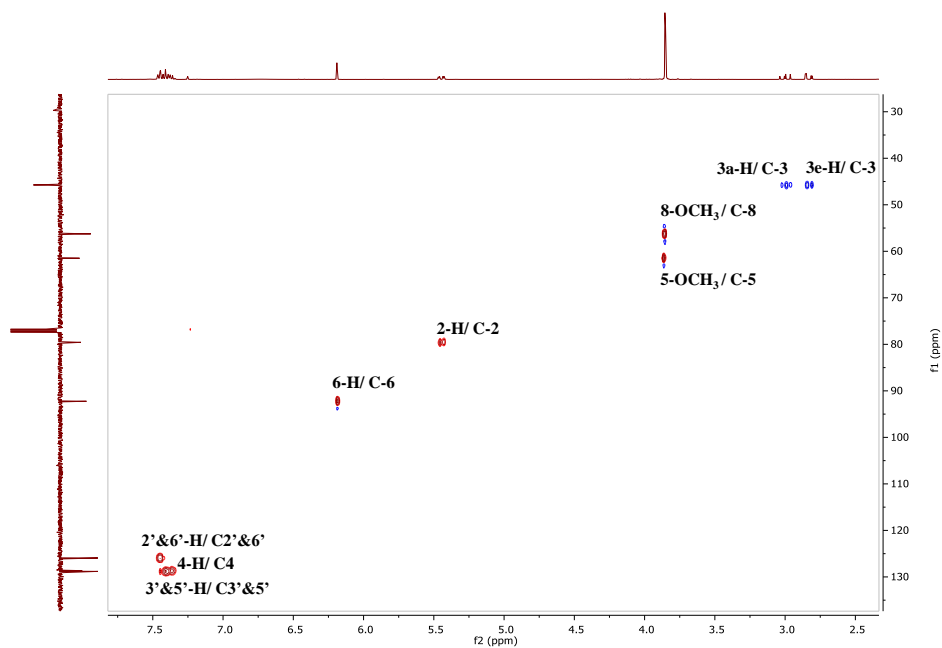**B**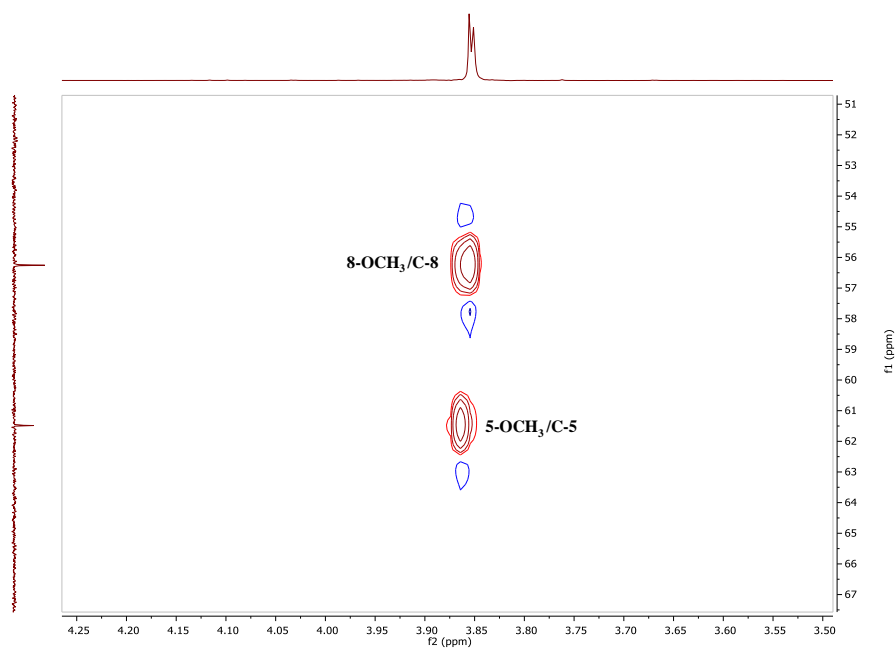

Supplementary material S24: (A) Full and (B) expansion of HSQC spectrum of compound 4 in CDCl<sub>3</sub>.

**Supplementary Table S4: NMR data for compound 4 in CDCl<sub>3</sub>.**

| Position           | $\delta_{\text{H}}$ (mult, J (Hz))                    | $\delta_{\text{C}}$ | HMBC                  |
|--------------------|-------------------------------------------------------|---------------------|-----------------------|
| 2                  | 5.45 (1H, dd, 12.9, 3.0)                              | 79.6                | C-1', C-2', C-4       |
| 3                  | 2.83 (1H, dd, 16.6, 3.1),<br>3.0 (1H, dd, 16.6, 13.0) | 45.7                | C-1', C-4, C-10       |
| 4                  | -                                                     | 189.0               | -                     |
| 5                  | -                                                     | 158.1               | -                     |
| 6                  | 6.20 (1H, s)                                          | 92.1                | C-5, C-7, C-8, C-10   |
| 7                  | -                                                     | 156.0               | -                     |
| 8                  | -                                                     | 128.6               | -                     |
| 9                  | -                                                     | 155.5               | -                     |
| 10                 | -                                                     | 105.9               | -                     |
| 1'                 | -                                                     | 138.7               | -                     |
| 2', 6'             | 7.47 (2H, m)                                          | 125.9               | C-2, C-3', C-4', C-5' |
| 3', 4', 5'         | 7.34 (3H, m)                                          | 128.8               | C-2', C-1'            |
| 5-OCH <sub>3</sub> | 3.85 (3H, s)                                          | 56.1                | C-5                   |
| 8-OCH <sub>3</sub> | 3.86 (3H, s)                                          | 61.4                | C-8                   |
